# Supplementary material for: Hiding in plain sight: DNA barcoding suggests cryptic species in all ‘well-known’ Australian flower beetles (Scarabaeidae: Cetoniinae)
Source: PeerJ journal article supplement (doi:10.7717/peerj.9348), 2020-06-16
Supplement: Table_S1.xlsx [file Table_S1.xlsx]

## Sheet: Lab Sheet
Process ID	Sample ID	Catalog Num	BIN	GenBank Accession	Seq. Length [#n]	Collection Date	Identification	Life Stage	Sex	Life Stage	Collectors	Collection Date	Country/Ocean	State/Province	Exact Site	Lat	Lon
AUCET601-18	AFBRC8098-05	AFBRC8098-05	BOLD:ADM8179	MT323781	646[0n]	13-Mar-2018	Aphanesthes pullata	Adult	M	Adult	David Baume	13-Mar-2018	Australia	Queensland	Isabella Falls	-15.3	145.005
AUCET602-18	AFBRC8098-06	AFBRC8098-06	BOLD:ADM8179	MT323782	646[0n]	13-Mar-2018	Aphanesthes pullata	Adult	M	Adult	David Baume	13-Mar-2018	Australia	Queensland	Isabella Falls	-15.3	145.005
AUCET626-18	AFBRC8121-01	AFBRC8121-01	BOLD:ADM8178	MT323780	667[0n]	02-Feb-2018	Aphanesthes pullata	Adult	F	Adult	Jack Hasenpusch	02-Feb-2018	Australia	Queensland	38.000 km W of Mt. Garnet	-17.677	144.75
AUCET571-18	AFBRC8085-02	AFBRC8085-02	BOLD:ADM8091	MT323783	646[0n]	03-Mar-2018	Aphanesthes sp_aisa_chm	Adult	M	Adult	D. Baume	03-Mar-2018	Australia	Queensland
AUCET581-18	AFBRC8089-01	AFBRC8089-01	BOLD:ADM8025	MT323785	667[0n]	21-Jan-2018	Aphanesthes succinea	Adult	M	Adult	Paul Hutchinson	21-Jan-2018	Australia	Western Australia	76.000 km W of Wubin	-30.1	115.835
AUCET582-18	AFBRC8089-02	AFBRC8089-02	BOLD:ADM8025	MT323786	667[0n]	21-Jan-2018	Aphanesthes succinea	Adult	M	Adult	Paul Hutchinson	21-Jan-2018	Australia	Western Australia	76.000 km W of Wubin	-30.1	115.835
AUCET589-18	AFBRC8092-01	AFBRC8092-01	BOLD:ACJ2926	MT323787	667[0n]	13-Jan-2018	Aphanesthes succinea	Adult	F	Adult	Paul Hutchinson	13-Jan-2018	Australia	Western Australia	2.000 km E of Saltlake	-29.859	115.173
AUCET207-13	MIC60633-001	MIC60633-001	BOLD:ACJ2926	MT323784	559[0n]	04-Jan-2003	Aphanesthes succinea	Adult	M	Adult	Paul Hutchinson	04-Jan-2003	Australia	Western Australia	Pipidinny km N of Perth	-31.583	115.683
AUCET327-13	MIC60873-001	MIC60873-001	BOLD:ADH1411	MT323788	559[1n]	14-Jan-2010	Bisallardiana decorticata	Adult	M	Adult	Cory Dale	14-Jan-2010	Australia	Queensland	1 km S of Mt. Molloy	-16.682	145.331
AUCET010-13	MIC61094-001	MIC61094-001	BOLD:ADH0834	MT323789	646[0n]	06-Jan-2013	Bisallardiana gymnopleura	Adult	M	Adult	C.& S.Moeseneder	06-Jan-2013	Australia	New South Wales	The Summit	-28.574	151.952
AUCET011-13	MIC61094-002	MIC61094-002	BOLD:ADH0834	MT323790	646[0n]	06-Jan-2013	Bisallardiana gymnopleura	Adult	F	Adult	C.& S.Moeseneder	06-Jan-2013	Australia	New South Wales	The Summit	-28.574	151.952
AUCET012-13	MIC61094-003	MIC61094-003	BOLD:ADH0834	MT323791	646[0n]	06-Jan-2013	Bisallardiana gymnopleura	Adult	F	Adult	C.& S.Moeseneder	06-Jan-2013	Australia	New South Wales	The Summit	-28.574	151.952
AUCET013-13	MIC61094-004	MIC61094-004	BOLD:ADH0834	MT323792	646[0n]	06-Jan-2013	Bisallardiana gymnopleura	Adult	F	Adult	C.& S.Moeseneder	06-Jan-2013	Australia	New South Wales	The Summit	-28.574	151.952
AUCET387-13	MIC60963-003	MIC60963-003		MT323795	313[0n]	04-Jan-2011	Bisallardiana sp_bdun_chm	Adult	F	Adult	C. Dale & B. Howton	04-Jan-2011	Australia	Queensland
AUCET389-13	MIC60963-005	MIC60963-005		MT323804	313[0n]	04-Jan-2011	Bisallardiana sp_bdun_chm	Adult	M	Adult	C. Dale & B. Howton	04-Jan-2011	Australia	Queensland
AUCET392-13	MIC60966-002	MIC60966-002	BOLD:ADH2865	MT323803	559[0n]	08-Jan-2011	Bisallardiana sp_bdun_chm	Adult	M	Adult	C. & T. Moeseneder, C. Dale	08-Jan-2011	Australia	Queensland
AUCET393-13	MIC60966-003	MIC60966-003		MT323802	313[0n]	08-Jan-2011	Bisallardiana sp_bdun_chm	Adult	F	Adult	C. & T. Moeseneder, C. Dale	08-Jan-2011	Australia	Queensland
AUCET394-13	MIC60966-004	MIC60966-004		MT323801	313[0n]	08-Jan-2011	Bisallardiana sp_bdun_chm	Adult	F	Adult	C. & T. Moeseneder, C. Dale	08-Jan-2011	Australia	Queensland
AUCET395-13	MIC60966-005	MIC60966-005		MT323800	313[0n]	08-Jan-2011	Bisallardiana sp_bdun_chm	Adult	M	Adult	C. & T. Moeseneder, C. Dale	08-Jan-2011	Australia	Queensland
AUCET396-13	MIC60966-006	MIC60966-006	BOLD:ADH2865	MT323799	559[4n]	08-Jan-2011	Bisallardiana sp_bdun_chm	Adult	F	Adult	C. & T. Moeseneder, C. Dale	08-Jan-2011	Australia	Queensland
AUCET397-13	MIC60966-007	MIC60966-007	BOLD:ADH2865	MT323798	559[0n]	08-Jan-2011	Bisallardiana sp_bdun_chm	Adult	M	Adult	C. & T. Moeseneder, C. Dale	08-Jan-2011	Australia	Queensland
AUCET398-13	MIC60966-012	MIC60966-012		MT323797	313[0n]	08-Jan-2011	Bisallardiana sp_bdun_chm	Adult	M	Adult	C. & T. Moeseneder, C. Dale	08-Jan-2011	Australia	Queensland
AUCET402-13	MIC60967-013	MIC60967-013		MT323796	313[0n]	08-Jan-2011	Bisallardiana sp_bdun_chm	Adult	M	Adult	C. & T. Moeseneder, C. Dale	08-Jan-2011	Australia	Queensland
AUCET403-13	MIC60967-015	MIC60967-015		MT323793	313[0n]	08-Nov-2011	Bisallardiana sp_bdun_chm	Adult	F	Adult	C. & T. Moeseneder, C. Dale	08-Nov-2011	Australia	Queensland
AUCET407-13	MIC60967-021	MIC60967-021		MT323794	313[0n]	08-Dec-2011	Bisallardiana sp_bdun_chm	Adult	M	Adult	C. & T. Moeseneder, C. Dale	08-Dec-2011	Australia	Queensland
AUCET603-18	AFBRC8098-07	AFBRC8098-07	BOLD:ADM9027	MT323805	667[0n]	13-Mar-2018	Bisallardiana sp_bisa_chm	Adult	F	Adult	D. Baume	13-Mar-2018	Australia	Queensland
AUCET556-18	AFBRC8061-03	AFBRC8061-03	BOLD:ADM8603	MT323807	667[0n]	26-Dec-2017	Bisallardiana sp_bmil_chm	Adult	F	Adult	C. & S. Moeseneder	26-Dec-2017	Australia	Queensland
AUCET557-18	AFBRC8061-04	AFBRC8061-04	BOLD:ADM8603	MT323808	667[0n]	26-Dec-2017	Bisallardiana sp_bmil_chm	Adult	F	Adult	C. & S. Moeseneder	26-Dec-2017	Australia	Queensland
AUCET558-18	AFBRC8061-05	AFBRC8061-05	BOLD:ADM8603	MT323806	667[0n]	26-Dec-2017	Bisallardiana sp_bmil_chm	Adult	F	Adult	C. & S. Moeseneder	26-Dec-2017	Australia	Queensland
AUCET087-13	MIC60108-001	MIC60108-001		MT323809	271[0n]	19-Nov-1999	Bisallardiana sp_bmtg_chm	Adult	M	Adult	C. Moeseneder	19-Nov-1999	Australia	Queensland
AUCET553-18	AFBRC8051-02	AFBRC8051-02	BOLD:ADM8258	MT323810	667[0n]	01-Dec-2017	Bisallardiana sp_bsmi_chm	Adult	M	Adult	G. Smith	01-Dec-2017	Australia	Queensland
AUCET554-18	AFBRC8051-03	AFBRC8051-03	BOLD:ADM8258	MT323811	667[0n]	01-Dec-2017	Bisallardiana sp_bsmi_chm	Adult	F	Adult	G. Smith	01-Dec-2017	Australia	Queensland
AUCET542-18	AFBRC8026-01	AFBRC8026-01	BOLD:ADM7867	MT323812	667[0n]	29-Oct-2017	Bisallardiana sp_btew_chm	Adult	M	Adult	C.& S.Moeseneder	29-Oct-2017	Australia	Queensland
AUCET543-18	AFBRC8033-01	AFBRC8033-01	BOLD:ADM8257	MT323814	667[0n]	24-Nov-2017	Bisallardiana sp_byat_chm	Adult	M	Adult	A. Yates	24-Nov-2017	Australia	Northern Territory
AUCET552-18	AFBRC8049-01	AFBRC8049-01	BOLD:ADM8257	MT323813	667[0n]	01-Dec-2017	Bisallardiana sp_byat_chm	Adult	M	Adult	M. Yates	01-Dec-2017	Australia	Northern Territory
AUCET627-18	AFBRC8122-01	AFBRC8122-01	BOLD:ADH2316	MT323815	667[0n]	30-Dec-2014	Bisallardiana variabilis	Adult	M	Adult	Jack Hasenpusch	30-Dec-2014	Australia	Queensland	Brampston Beach	-17.363	146.018
AUCET074-13	MIC10009-001	MIC10009-001	BOLD:ADH2316	MT323817	559[3n]	20-Dec-2009	Bisallardiana variabilis	Adult	M	Adult	J.Hasenpusch	20-Dec-2009	Australia	Queensland	Polly Creek, Garradunga	-17.46	145.96
AUCET075-13	MIC10010-001	MIC10010-001		MT323818	559[9n]	25-Feb-2010	Bisallardiana variabilis	Adult	F	Adult	J.& P.Hasenpusch	25-Feb-2010	Australia	Queensland	42 km W of Mt. Garnet	-17.933	144.869
AUCET325-13	MIC60872-002	MIC60872-002	BOLD:ADH2316	MT323816	559[0n]	13-Jan-2010	Bisallardiana variabilis	Adult	F	Adult	Cory Dale	13-Jan-2010	Australia	Queensland	Oak Forest Road 4 km W of Myola	-16.812	145.572
AUCET160-13	MIC60548-002	MIC60548-002	BOLD:ACJ2549	MT323821	667[0n]	29-Mar-2008	Chlorobapta frontalis	Adult	M	Adult	Richard Zietek	29-Mar-2008	Australia	Queensland	Toohey Forest, Griffith University grounds, Nathan	-27.544	153.055
AUCET161-13	MIC60548-003	MIC60548-003	BOLD:ACJ2549	MT323823	667[0n]	29-Mar-2008	Chlorobapta frontalis	Adult	M	Adult	Richard Zietek	29-Mar-2008	Australia	Queensland	Toohey Forest, Griffith University grounds, Nathan	-27.544	153.055
AUCET162-13	MIC60548-005	MIC60548-005	BOLD:ACJ2549	MT323820	667[0n]	29-Mar-2008	Chlorobapta frontalis	Larva		Larva	Richard Zietek	29-Mar-2008	Australia	Queensland	Toohey Forest, Griffith University grounds, Nathan	-27.544	153.055
AUCET163-13	MIC60548-006	MIC60548-006	BOLD:ACJ2549	MT323819	667[0n]	29-Mar-2008	Chlorobapta frontalis	Larva		Larva	Richard Zietek	29-Mar-2008	Australia	Queensland	Toohey Forest, Griffith University grounds, Nathan	-27.544	153.055
AUCET166-13	MIC60551-001	MIC60551-001	BOLD:ACJ2549	MT323822	667[0n]	09-Feb-2008	Chlorobapta frontalis	Adult	M	Adult	Richard Zietek	09-Feb-2008	Australia	Queensland	Toohey Forest, Griffith University grounds, Nathan	-27.544	153.055
AUCET584-18	AFBRC8089-04	AFBRC8089-04	BOLD:ADM7399	MT323825	667[0n]	21-Jan-2018	Chlorobapta goerlingi	Adult	M	Adult	Paul Hutchinson	21-Jan-2018	Australia	Western Australia	76.000 km W of Wubin	-30.1	115.835
AUCET585-18	AFBRC8089-05	AFBRC8089-05	BOLD:ADM7399	MT323824	667[0n]	21-Jan-2018	Chlorobapta goerlingi	Adult	M	Adult	Paul Hutchinson	21-Jan-2018	Australia	Western Australia	76.000 km W of Wubin	-30.1	115.835
AUCET587-18	AFBRC8090-02	AFBRC8090-02	BOLD:ADM7399	MT323826	667[0n]	28-Jan-2018	Chlorobapta goerlingi	Adult	M	Adult	Mike Powell	28-Jan-2018	Australia	Western Australia	20.000 km S of Paynes Find	-29.33	117.506
AUCET597-18	AFBRC8096-01	AFBRC8096-01	BOLD:ADH1858	MT323827	667[0n]	25-Dec-2017	Chlorobapta sp_svir_chm	Adult	M	Adult	P. Hutchinson	25-Dec-2017	Australia	Western Australia
AUCET374-13	MIC60919-003	MIC60919-003		MT323828	313[0n]	18-Jul-2010	Chlorobapta sp_svir_chm	Larva		Larva	P. Hutchinson	18-Jul-2010	Australia	Western Australia
AUCET474-13	MIC61041-004	MIC61041-004	BOLD:ADH1858	MT323829	559[0n]		Chlorobapta sp_svir_chm	Adult	M	Adult	P. Hutchinson		Australia	Western Australia
AUCET109-13	MIC60440-032	MIC60440-032	BOLD:ACJ2654	MT323838	667[0n]	06-Jan-2007	Chondropyga dorsalis	Adult	F	Adult	C.& S.Moeseneder	06-Jan-2007	Australia	Queensland	Rosins Lookout, Beechmont	-28.118	153.203
AUCET110-13	MIC60443-001	MIC60443-001	BOLD:ACJ2654	MT323841	601[0n]	10-Jan-2007	Chondropyga dorsalis	Adult	F	Adult	C.& S.Moeseneder	10-Jan-2007	Australia	Queensland	Rosins Lookout, Beechmont	-28.117	153.203
AUCET119-13	MIC60489-001	MIC60489-001	BOLD:ACJ2575	MT323832	667[0n]	21-Nov-2007	Chondropyga dorsalis	Adult	M	Adult	C.& S.Moeseneder	21-Nov-2007	Australia	Queensland	Point Talburpin, Redland Bay	-27.641	153.312
AUCET122-13	MIC60497-001	MIC60497-001	BOLD:ACJ2654	MT323835	667[0n]	01-Dec-2007	Chondropyga dorsalis	Adult	M	Adult	C.& S.Moeseneder	01-Dec-2007	Australia	Queensland	Rosins Lookout, Beechmont	-28.118	153.203
AUCET123-13	MIC60497-002	MIC60497-002	BOLD:ACJ2654	MT323836	667[0n]	01-Dec-2007	Chondropyga dorsalis	Adult	M	Adult	C.& S.Moeseneder	01-Dec-2007	Australia	Queensland	Rosins Lookout, Beechmont	-28.118	153.203
AUCET142-13	MIC60523-002	MIC60523-002	BOLD:ACJ2654	MT323834	667[0n]	20-Dec-2007	Chondropyga dorsalis	Adult	F	Adult	C. & A.Moeseneder	20-Dec-2007	Australia	Queensland	Rosins Lookout, Beechmont	-28.118	153.203
AUCET229-13	MIC60648-001	MIC60648-001	BOLD:ACJ2655	MT323840	559[0n]	10-Nov-2005	Chondropyga dorsalis	Adult	F	Adult	Justin Bartlett	10-Nov-2005	Australia	Queensland	Tarragindi, near Esher Street bridge	-27.52	153.052
AUCET230-13	MIC60649-001	MIC60649-001	BOLD:ACJ2575	MT323830	559[0n]	29-Oct-2003	Chondropyga dorsalis	Adult	M	Adult	Justin Bartlett	29-Oct-2003	Australia	Queensland	Indooroopilly	-27.497	152.974
AUCET241-13	MIC60665-003	MIC60665-003	BOLD:ACJ2734	MT323831	610[1n]	02-Nov-2008	Chondropyga dorsalis	Adult	F	Adult	C.& S.Moeseneder	02-Nov-2008	Australia	Queensland	Point Talburpin, Redland Bay	-27.644	153.311
AUCET244-13	MIC60679-001	MIC60679-001	BOLD:ACJ2734	MT323833	667[0n]	21-Nov-2008	Chondropyga dorsalis	Adult	M	Adult	C.& S.Moeseneder	21-Nov-2008	Australia	Queensland	Point Talburpin, Redland Bay	-27.644	153.311
AUCET245-13	MIC60679-003	MIC60679-003	BOLD:ACJ2734	MT323837	667[0n]	21-Nov-2008	Chondropyga dorsalis	Adult	F	Adult	C.& S.Moeseneder	21-Nov-2008	Australia	Queensland	Point Talburpin, Redland Bay	-27.644	153.311
AUCET251-13	MIC60713-001	MIC60713-001	BOLD:ACJ2654	MT323839	627[0n]	06-Jan-2009	Chondropyga dorsalis	Adult	M	Adult	C.& T.Moeseneder	06-Jan-2009	Australia	Queensland	5 km WSW of Nerang	-28.009	153.288
AUCET083-13	MIC10018-001	T159363	BOLD:ADG9136	MT323842	559[0n]	04-Oct-1999	Chondropyga insignicosta	Adult	M	Adult	D & I Cook R/F	04-Oct-1999	Australia	Queensland	Stony Ck, track Xing, 9031	-21.617	148.983
AUCET550-18	AFBRC8048-01	AFBRC8048-01	BOLD:ADM8142	MT323845	646[0n]	19-Nov-2017	Chondropyga sp_cmoo_chm	Adult	M	Adult	C. & S. Moeseneder	19-Nov-2017	Australia	Queensland
AUCET551-18	AFBRC8048-02	AFBRC8048-02	BOLD:ADM8142	MT323843	667[0n]	19-Nov-2017	Chondropyga sp_cmoo_chm	Adult	M	Adult	C. & S. Moeseneder	19-Nov-2017	Australia	Queensland
AUCET080-13	MIC10015-001	T159360	BOLD:ADH0328	MT323844	559[0n]	12-Dec-2002	Chondropyga sp_cmoo_chm	Adult	M	Adult	L. Popple	12-Dec-2002	Australia	Queensland
AUCET569-18	AFBRC8084-01	AFBRC8084-01	BOLD:ADM8031	MT323846	646[0n]	10-Dec-2017	Chondropyga sp_cnum_chm	Adult	M	Adult	C. & S. Moeseneder	10-Dec-2017	Australia	New South Wales
AUCET570-18	AFBRC8084-02	AFBRC8084-02	BOLD:ADM8031	MT323849	667[0n]	10-Dec-2017	Chondropyga sp_cnum_chm	Adult	M	Adult	C. & S. Moeseneder	10-Dec-2017	Australia	New South Wales
AUCET629-18	AFBRC8100-01	AFBRC8100-01	BOLD:ADM8031	MT323847	667[0n]	20-Mar-2018	Chondropyga sp_cnum_chm	Adult	M	Adult	C. & S. Moeseneder	20-Mar-2018	Australia	New South Wales
AUCET298-13	MIC60821-001	MIC60821-001		MT323848	339[0n]	25-Jan-1992	Chondropyga sp_cnum_chm	Adult	M	Adult	M. De Baar	25-Jan-1992	Australia	Queensland
AUCET564-18	AFBRC8074-02	AFBRC8074-02	BOLD:ADG8703	MT323852	667[0n]	12-Dec-2017	Clithria albersi	Adult	M	Adult	C.& S.Moeseneder	12-Dec-2017	Australia	Queensland	Junction Western Creek Dunmore Road	-27.698	151.032
AUCET414-13	MIC60974-001	MIC60974-001	BOLD:ADG8703	MT323850	559[3n]	15-Jan-2011	Clithria albersi	Adult	F	Adult	C.Dale & B.Howton	15-Jan-2011	Australia	Queensland	Junction Dunmore-Western Creek Road and Dunmore-Tara Road	-27.7	151.021
AUCET136-13	MIC61063-001	MIC61063-001	BOLD:ADG8703	MT323851	646[0n]	13-Dec-2012	Clithria albersi	Adult	F	Adult	C.& S.Moeseneder	13-Dec-2012	Australia	Queensland	Dunmore State Forest	-27.613	151.055
AUCET598-18	AFBRC8097-01	AFBRC8097-01	BOLD:ADM7763	MT323853	667[0n]	01-Jan-2018	Clithria eucnemis	Adult	M	Adult	Geoff Walker	01-Jan-2018	Australia	Victoria	Upper Yarra Dam, Reefton	-37.674	145.876
AUCET599-18	AFBRC8097-02	AFBRC8097-02	BOLD:ADM7763	MT323854	667[0n]	01-Jan-2018	Clithria eucnemis	Adult	M	Adult	Geoff Walker	01-Jan-2018	Australia	Victoria	Upper Yarra Dam, Reefton	-37.674	145.876
AUCET458-13	MIC61026-021	MIC61026-021		MT323855	313[0n]	07-Jan-2012	Clithria eucnemis	Adult	M	Adult	C.& S.Moeseneder and Cory Dale	07-Jan-2012	Australia	Queensland	Dunmore State Forest	-27.695	150.99
AUCET622-18	AFBRC8117-02	AFBRC8117-02	BOLD:ADM8078	MT323856	646[1n]	10-Feb-2016	Clithria tibiale	Adult	M	Adult	Jack Hasenpusch	10-Feb-2016	Australia	Queensland	38.000 km W of Mt. Garnet	-17.677	144.75
AUCET261-13	MIC60733-001	MIC60733-001		MT323857	667[17n]	16-Mar-2009	Diaphonia luteola	Adult	F	Adult	Paul Hutchinson	16-Mar-2009	Australia	Western Australia	Mindarie	-31.686	115.704
AUCET412-13	MIC60971-001	MIC60971-001	BOLD:ACJ2784	MT323859	559[0n]	22-Feb-2010	Diaphonia sp_dnul_chm	Adult	M	Adult	B. Howton	22-Feb-2010	Australia	Western Australia
AUCET413-13	MIC60971-003	MIC60971-003	BOLD:ACJ2784	MT323858	559[0n]	22-Feb-2010	Diaphonia sp_dnul_chm	Adult	M	Adult	B. Howton	22-Feb-2010	Australia	Western Australia
AUCET612-18	AFBRC8110-01	AFBRC8110-01	BOLD:ADM8348	MT323862	667[0n]	18-Feb-2018	Diaphonia xanthopyga	Adult	M	Adult	Mark Hura	18-Feb-2018	Australia	South Australia	Parafield Gardens, Adelaide	-34.788	138.624
AUCET613-18	AFBRC8111-01	AFBRC8111-01	BOLD:ADM8348	MT323860	667[0n]	03-Mar-2018	Diaphonia xanthopyga	Adult	M	Adult	Mark Hura	03-Mar-2018	Australia	South Australia	Parafield Gardens, Adelaide	-34.788	138.624
AUCET614-18	AFBRC8112-01	AFBRC8112-01	BOLD:ADM8348	MT323861	667[0n]	03-Mar-2018	Diaphonia xanthopyga	Adult	F	Adult	Mark Hura	03-Mar-2018	Australia	South Australia	Parafield Gardens, Adelaide	-34.788	138.624
AUCET170-13	MIC60560-001	MIC60560-001	BOLD:ACJ2812	MT323864	559[0n]	01-May-1996	Dilochrosis atripennis	Adult	M	Adult		01-May-1996	Australia	Western Australia	30 km S of Derby	-17.577	123.628
AUCET172-13	MIC60565-002	MIC60565-002	BOLD:ACJ2812	MT323865	517[0n]	02-Jan-1996	Dilochrosis atripennis	Adult	M	Adult	R.Eastwood	02-Jan-1996	Australia	New South Wales	24 km W of Grafton	-29.691	152.685
AUCET173-13	MIC60567-001	MIC60567-001			178[0n]	20-Jan-2001	Dilochrosis atripennis	Adult	M	Adult	D.Knowles	20-Jan-2001	Australia	Western Australia	78 km E of Lake King	-33.105	120.447
AUCET179-13	MIC60577-001	MIC60577-001	BOLD:ACJ2812	MT323866	517[1n]		Dilochrosis atripennis	Adult	M	Adult	R.Mayo		Australia	New South Wales	Grafton	-29.691	152.933
AUCET180-13	MIC60578-002	MIC60578-002	BOLD:ACJ2812	MT323867	509[0n]	26-Feb-1997	Dilochrosis atripennis	Adult	F	Adult	Jack Hasenpusch	26-Feb-1997	Australia	Queensland	Forsayth [misspelled as Forsyth]	-18.589	143.603
AUCET181-13	MIC60581-002	MIC60581-002	BOLD:ACJ2812	MT323868	559[0n]	01-Mar-1996	Dilochrosis atripennis	Adult	F	Adult	H.Demarz	01-Mar-1996	Australia	Western Australia	Ord Ranges	-20.296	119.143
AUCET233-13	MIC60656-003	MIC60656-003	BOLD:ACJ2812	MT323863	658[0n]	01-May-2008	Dilochrosis atripennis	Larva		Larva	Jack Hasenpusch	01-May-2008	Australia	Queensland	30 km S of Normanton	-17.943	141.079
AUCET234-13	MIC60656-004	MIC60656-004	BOLD:ACJ2812	MT323869	667[0n]	01-May-2008	Dilochrosis atripennis	Larva		Larva	Jack Hasenpusch	01-May-2008	Australia	Queensland	30 km S of Normanton	-17.943	141.079
AUCET236-13	MIC60659-001	MIC60659-001	BOLD:ACJ2812	MT323870	667[0n]	01-May-2008	Dilochrosis atripennis	Adult	M	Adult	Jack Hasenpusch	01-May-2008	Australia	Queensland	15 km S of Normanton	-17.806	141.08
AUCET238-13	MIC60661-003	MIC60661-003	BOLD:ACJ2812	MT323871	667[0n]	01-May-2008	Dilochrosis atripennis	Adult	M	Adult	Jack Hasenpusch	01-May-2008	Australia	Queensland	100 km S of Normanton	-18.581	141.072
AUCET623-18	AFBRC8119-01	AFBRC8119-01	BOLD:ADH0343	MT323873	667[0n]	03-Apr-2018	Dilochrosis balteata	Adult	M	Adult	Jack Hasenpusch	03-Apr-2018	Australia	Queensland	Ex Melbourne Zoo stock from Daintree and possible AIF stock	-16.17	145.418
AUCET624-18	AFBRC8119-02	AFBRC8119-02	BOLD:ADH0343	MT323872	667[0n]	03-Apr-2018	Dilochrosis balteata	Adult	F	Adult	Jack Hasenpusch	03-Apr-2018	Australia	Queensland	Ex Melbourne Zoo stock from Daintree and possible AIF stock	-16.17	145.418
AUCET256-13	MIC60729-002	MIC60729-002	BOLD:ADH0343	MT323874	559[0n]	01-Apr-2009	Dilochrosis balteata	Adult	M	Adult	Jack Hasenpusch	01-Apr-2009	Australia	Queensland	Garradunga	-17.46	145.996
AUCET155-13	MIC60541-002	MIC60541-002	BOLD:ACJ2571	MT323878	667[0n]	01-Feb-2008	Dilochrosis brownii	Larva		Larva	J. Hasenpusch	01-Feb-2008	Australia	Queensland	30 km W of Mt. Garnet	-17.864	144.941
AUCET158-13	MIC60546-001	MIC60546-001	BOLD:ACJ2571	MT323879	667[0n]	15-Jan-2008	Dilochrosis brownii	Adult	F	Adult	Trevor Lambkin	15-Jan-2008	Australia	Queensland	Dauan Island, Torres Strait	-9.421	142.536
AUCET159-13	MIC60546-002	MIC60546-002	BOLD:ACJ2571	MT323880	559[0n]	15-Jan-2008	Dilochrosis brownii	Adult	M	Adult	Trevor Lambkin	15-Jan-2008	Australia	Queensland	Dauan Island, Torres Strait	-9.421	142.536
AUCET224-13	MIC60722-001	MIC60722-001	BOLD:ACJ2571	MT323881	667[0n]	01-Mar-2009	Dilochrosis brownii	Adult	M	Adult	Paul Hutchinson	01-Mar-2009	Australia	Western Australia	14 km N of Cue	-27.31	117.96
AUCET257-13	MIC60730-004	MIC60730-004	BOLD:ACJ2571	MT323875	559[0n]	01-Apr-2009	Dilochrosis brownii	Adult	M	Adult	J. Hasenpusch	01-Apr-2009	Australia	Queensland	30 km W of Mt. Garnet	-17.864	144.941
AUCET258-13	MIC60730-005	MIC60730-005		MT323876	313[0n]	01-Apr-2009	Dilochrosis brownii	Adult	M	Adult	C.& S.Moeseneder	01-Apr-2009	Australia	Queensland	30 km W of Mt Garnet	-17.864	144.941
AUCET495-13	MIC61138-001	71419	BOLD:ADH1710	MT323877	667[0n]	20-Mar-2007	Dilochrosis brownii	Adult	M	Adult		20-Mar-2007	Australia	Western Australia	North Maret Island	-14.4	124.983
AUCET235-13	MIC60657-001	MIC60657-001	BOLD:ACJ2506	MT323884	667[2n]		Dilochrosis walteri	Adult	F	Adult			Australia	Western Australia	Badjirrajirra creek crossing	-22.102	114.092
AUCET242-13	MIC60673-001	MIC60673-001	BOLD:ACJ2506	MT323886	667[1n]	10-Mar-2008	Dilochrosis walteri	Larva		Larva	P.Hutchinson	10-Mar-2008	Australia	Western Australia	Badjirrajirra creek crossing 22 km S of Exmouth	-22.102	114.092
AUCET259-13	MIC60731-001	MIC60731-001	BOLD:ACJ2506	MT323885	667[0n]	21-Mar-2009	Dilochrosis walteri	Adult		Adult	C.& S.Moeseneder	21-Mar-2009	Australia	Western Australia	Badjirrajirra creek crossing	-22.102	114.092
AUCET365-13	MIC60912-001	MIC60912-001	BOLD:ACJ2506	MT323882	559[0n]	01-Feb-2010	Dilochrosis walteri	Adult	F	Adult		01-Feb-2010	Australia	Western Australia	Badjirrajirra creek crossing	-22.102	114.092
AUCET366-13	MIC60912-002	MIC60912-002	BOLD:ACJ2506	MT323883	559[0n]	01-Feb-2010	Dilochrosis walteri	Adult	M	Adult		01-Feb-2010	Australia		Badjirrajirra creek crossing	-22.102	114.092
AUCET375-13	MIC60923-001	MIC60923-001	BOLD:ACJ2506	MT323887	559[0n]	18-Mar-2010	Dilochrosis walteri	Adult		Adult	C.& S.Moeseneder	18-Mar-2010	Australia	Western Australia	Badjirrajirra creek crossing	-22.102	114.092
AUCET121-13	MIC60495-003	MIC60495-003	BOLD:AAH3787	MT323891	517[0n]	25-Nov-2007	Eupoecila australasiae	Adult	M	Adult	C.& S.Moeseneder	25-Nov-2007	Australia	Queensland	Point Talburpin, Redland Bay	-27.639	153.312
AUCET125-13	MIC60500-014	MIC60500-014	BOLD:ACJ2840	MT323890	667[0n]	12-Dec-2007	Eupoecila australasiae	Adult	M	Adult	C.& W.Moeseneder	12-Dec-2007	Australia	Queensland	6 km S of Port Douglas	-16.532	145.465
AUCET164-13	MIC60549-003	MIC60549-003	BOLD:AAH3787	MT323889	667[0n]	02-May-2008	Eupoecila australasiae	Larva		Larva	C.& T.Moeseneder	02-May-2008	Australia	Queensland	Point Talburpin, Redland Bay	-27.646	153.309
AUCET197-13	MIC60617-004	MIC60617-004	BOLD:AAH3787	MT323888	667[0n]	29-Jun-2008	Eupoecila australasiae	Larva		Larva	C.& T.Moeseneder	29-Jun-2008	Australia	Queensland	Redland Bay	-27.63	153.312
AUCET198-13	MIC60618-003	MIC60618-003	BOLD:AAH3787	MT323894	667[0n]	07-Jul-2008	Eupoecila australasiae	Adult	M	Adult	T.Moeseneder	07-Jul-2008	Australia	Queensland	Point Talburpin, Redland Bay	-27.646	153.31
AUCET215-13	MIC60639-001	MIC60639-001		MT323892	237[0n]	06-Jan-2006	Eupoecila australasiae	Adult	M	Adult	A.I.Knight	06-Jan-2006	Australia	Queensland	Dauan Island, Torres Strait	-9.422	142.534
AUCET239-13	MIC60664-005	MIC60664-005	BOLD:AAH3787	MT323893	667[0n]	29-Oct-2008	Eupoecila australasiae	Adult	M	Adult	T.Moeseneder	29-Oct-2008	Australia	Queensland	Point Talburpin, Redland Bay	-27.644	153.311
AUCET476-13	MIC61042-002	MIC61042-002	BOLD:ADH0609	MT323895	559[0n]	19-Jan-2012	Eupoecila evanescens	Adult	M	Adult	J. Hasenpusch	19-Jan-2012	Australia	Queensland	30 km W of Mt. Garnet	-17.683	144.831
AUCET573-18	AFBRC8086-02	AFBRC8086-02	BOLD:ACJ2776	MT323897	667[0n]	21-Jan-2018	Eupoecila inscripta	Adult	M	Adult	Paul Hutchinson	21-Jan-2018	Australia	Western Australia	25.000 km S of Great Northern Highway	-30.111	117.26
AUCET583-18	AFBRC8089-03	AFBRC8089-03	BOLD:ACJ2776	MT323896	667[0n]	21-Jan-2018	Eupoecila inscripta	Adult	F	Adult	Paul Hutchinson	21-Jan-2018	Australia	Western Australia	76.000 km W of Wubin	-30.1	115.835
AUCET586-18	AFBRC8090-01	AFBRC8090-01	BOLD:ACJ2776	MT323899	667[0n]	28-Jan-2018	Eupoecila inscripta	Adult	M	Adult	Mike Powell	28-Jan-2018	Australia	Western Australia	20.000 km S of Paynes Find	-29.33	117.506
AUCET165-13	MIC60550-001	MIC60550-001	BOLD:ACJ2776	MT323898	559[0n]	12-Feb-2007	Eupoecila inscripta	Adult	M	Adult	Richard Zietek	12-Feb-2007	Australia	Western Australia	Carnarvon	-24.8841	113.658
AUCET191-13	MIC60607-001	MIC60607-001	BOLD:ADH2889	MT323900	667[0n]	14-Feb-2005	Evanides rufolatera	Adult	M	Adult	Bill Cooper	14-Feb-2005	Australia	Queensland	Topaz `Chowchilla`	-17.43	145.721
AUCET567-18	AFBRC8074-05	AFBRC8074-05	BOLD:ACJ2979	MT323904	667[0n]	12-Dec-2017	Glycyphana brunnipes	Adult		Adult	C.& S.Moeseneder	12-Dec-2017	Australia	Queensland	Junction Western Creek Dunmore Road	-27.698	151.032
AUCET085-13	MIC60031-037	MIC60031-037	BOLD:ACJ2979	MT323903	304[0n]	05-Nov-2000	Glycyphana brunnipes	Adult	M	Adult	C.& S.Moeseneder	05-Nov-2000	Australia	Queensland	Redland Bay, across from Lagoon Island (Muriel Street)	-27.686	153.314
AUCET091-13	MIC60404-014	MIC60404-014	BOLD:ACJ2979	MT323902	559[5n]	11-Nov-2006	Glycyphana brunnipes	Adult	M	Adult	C.& S.Moeseneder	11-Nov-2006	Australia	Queensland	Redland Bay	-27.625	153.29
AUCET128-13	MIC60501-005	MIC60501-005	BOLD:ACJ2915	MT323901	667[0n]	12-Dec-2007	Glycyphana brunnipes	Adult		Adult	C.& W.Moeseneder	12-Dec-2007	Australia	Queensland	Atherton	-17.27	145.487
AUCET625-18	AFBRC8120-01	AFBRC8120-01	BOLD:ACJ2563	MT323905	646[1n]	02-Feb-2018	Glycyphana papua	Adult	F	Adult	Jack Hasenpusch	02-Feb-2018	Australia	Queensland	38.000 km W of Mt. Garnet	-17.677	144.75
AUCET359-13	MIC60906-001	MIC60906-001	BOLD:ACJ2563	MT323906	559[0n]	14-Feb-2010	Glycyphana papua	Adult	M	Adult	J.Hasenpusch	14-Feb-2010	Australia	Queensland	40 km W of Mt. Garnet	-17.933	144.869
AUCET114-13	MIC60446-008	MIC60446-008	BOLD:ACJ2563	MT323907	559[1n]	11-Jan-2007	Glycyphana pulchra	Adult	M	Adult	C.& S.Moeseneder	11-Jan-2007	Australia	Queensland	Rosins Lookout, Beechmont	-28.118	153.203
AUCET335-13	MIC60875-001	MIC60875-001		MT323908	399[6n]	21-Jan-2010	Glycyphana pulchra	Adult	M	Adult	C. Moeseneder & C. Dale	21-Jan-2010	Australia	Queensland	Rosins Lookout, Beechmont	-28.12	153.201
AUCET095-13	MIC60427-001	MIC60427-001	BOLD:AAH3789	MT323915	667[0n]	23-Dec-2006	Glycyphana stolata	Adult		Adult	C.& S.Moeseneder	23-Dec-2006	Australia	Queensland	Beechmont	-28.138	153.19
AUCET116-13	MIC60480-002	MIC60480-002	BOLD:AAH3789	MT323909	517[0n]	01-Sep-2007	Glycyphana stolata	Adult	F	Adult	C.& S.Moeseneder	01-Sep-2007	Australia	Queensland	Redland Bay	-27.622	153.31
AUCET117-13	MIC60481-002	MIC60481-002	BOLD:AAH3789	MT323912	559[0n]	02-Sep-2007	Glycyphana stolata	Adult	M	Adult	C.& S.Moeseneder	02-Sep-2007	Australia	Queensland	km of Cleveland	-27.56	153.269
AUCET105-13	MIC60512-001	MIC60512-001	BOLD:AAI7324	MT323914	667[0n]	11-Dec-2007	Glycyphana stolata	Adult		Adult	C.& W.Moeseneder	11-Dec-2007	Australia	Queensland	Mount Molloy	-16.679	145.331
AUCET106-13	MIC60518-001	MIC60518-001	BOLD:ACJ2805	MT323916	667[0n]	15-Dec-2007	Glycyphana stolata	Adult		Adult	C.& W.Moeseneder	15-Dec-2007	Australia	Queensland	Kuranda	-16.82	145.634
AUCET139-13	MIC60521-021	MIC60521-021	BOLD:AAI7324	MT323913	559[0n]	16-Dec-2007	Glycyphana stolata	Adult		Adult	C.& W.Moeseneder	16-Dec-2007	Australia	Queensland	5 km S of Palm Cove	-16.795	145.681
AUCET217-13	MIC60640-001	MIC60640-001	BOLD:ACJ2806	MT323911	514[0n]	21-Dec-2005	Glycyphana stolata	Adult	F	Adult	A.I.Knight	21-Dec-2005	Australia	Queensland	Dauan Island, Torres Strait	-9.422	142.534
AUCET218-13	MIC60641-001	MIC60641-001	BOLD:AAI7324	MT323910	559[0n]	28-Dec-2005	Glycyphana stolata	Adult	F	Adult	Justin Bartlett	28-Dec-2005	Australia	Queensland	Mareeba	-16.992	145.422
AUCET574-18	AFBRC8086-03	AFBRC8086-03	BOLD:ACJ2784	MT323919	667[1n]	21-Jan-2018	Hemichnoodes mniszechi	Adult	F	Adult	Paul Hutchinson	21-Jan-2018	Australia	Western Australia	25.000 km S of Great Northern Highway	-30.111	117.26
AUCET575-18	AFBRC8086-04	AFBRC8086-04	BOLD:ACJ2784	MT323918	667[1n]	21-Jan-2018	Hemichnoodes mniszechi	Adult	M	Adult	Paul Hutchinson	21-Jan-2018	Australia	Western Australia	25.000 km S of Great Northern Highway	-30.111	117.26
AUCET174-13	MIC60567-002	MIC60567-002	BOLD:ACJ2784	MT323917	667[0n]	20-Jan-2001	Hemichnoodes mniszechi	Larva		Larva	D.Knowles	20-Jan-2001	Australia	Western Australia	78 km E of Lake King	-33.105	120.447
AUCET607-18	AFBRC8104-01	AFBRC8104-01	BOLD:ACJ2784	MT323920	667[0n]	27-Jan-2018	Hemichnoodes parryi	Adult	M	Adult	Allen Sundholm (leg), Robert Richardson, Andreas Urban	27-Jan-2018	Australia	New South Wales	18.000 km W of Euabalong West	-33.047	146.198
AUCET608-18	AFBRC8104-02	AFBRC8104-02	BOLD:ACJ2784	MT323922	667[1n]	27-Jan-2018	Hemichnoodes parryi	Adult	F	Adult	Allen Sundholm (leg), Robert Richardson, Andreas Urban	27-Jan-2018	Australia	New South Wales	18.000 km W of Euabalong West	-33.047	146.198
AUCET609-18	AFBRC8104-04	AFBRC8104-04	BOLD:ACJ2784	MT323921	667[1n]	27-Jan-2018	Hemichnoodes parryi	Adult	M	Adult	Allen Sundholm (leg), Robert Richardson, Andreas Urban	27-Jan-2018	Australia	New South Wales	18.000 km W of Euabalong West	-33.047	146.198
AUCET604-18	AFBRC8099-01	AFBRC8099-01	BOLD:ACJ2595	MT323924	646[0n]	06-Mar-2018	Hemipharis insularis	Adult		Adult	David Baume	06-Mar-2018	Australia	Queensland	Newcastle Range	-18.302	143.745
AUCET153-13	MIC60540-008	MIC60540-008	BOLD:ACJ2595	MT323923	667[0n]	03-Apr-2008	Hemipharis insularis	Adult	F	Adult	J. Hasenpusch	03-Apr-2008	Australia	Queensland	30 km W of Mt. Garnet	-17.864	144.941
AUCET154-13	MIC60540-009	MIC60540-009	BOLD:ACJ2595	MT323925	667[0n]	03-Apr-2008	Hemipharis insularis	Adult	M	Adult	J. Hasenpusch	03-Apr-2008	Australia	Queensland	30 km W of Mt. Garnet	-17.864	144.941
AUCET131-13	MIC60502-001	MIC60502-001	BOLD:ACJ2985	MT323928	667[0n]	16-Dec-2007	Ischiopsopha pulchripes	Adult	M	Adult	C.& W.Moeseneder	16-Dec-2007	Australia	Queensland	Mowbray Valley 8 km S of Port Douglas	-16.577	145.483
AUCET133-13	MIC60502-006	MIC60502-006	BOLD:ACJ2985	MT323927	559[0n]	16-Dec-2007	Ischiopsopha pulchripes	Adult	M	Adult	C.& W.Moeseneder	16-Dec-2007	Australia	Queensland	Mowbray Valley 8 km S of Port Douglas	-16.577	145.483
AUCET169-13	MIC60554-001	MIC60554-001	BOLD:ACJ2985	MT323926	559[0n]	29-Jan-2004	Ischiopsopha pulchripes	Adult	F	Adult	A.I.Knight	29-Jan-2004	Australia	Queensland	Dauan Island, Torres Strait	-9.421	142.536
AUCET126-13	MIC60501-001	MIC60501-001	BOLD:ACJ2855	MT323933	667[0n]	12-Dec-2007	Ischiopsopha wallacei	Adult	M	Adult	C.& W.Moeseneder	12-Dec-2007	Australia	Queensland	Atherton	-17.27	145.487
AUCET147-13	MIC60529-002	MIC60529-002	BOLD:ACJ2855	MT323930	667[0n]	24-Nov-2008	Ischiopsopha wallacei	Larva		Larva	C. Moeseneder	24-Nov-2008	Australia	Queensland	Mowbray Valley, 8 km S of Port Douglas	-16.5771	145.483
AUCET148-13	MIC60529-004	MIC60529-004	BOLD:ACJ2855	MT323929	667[0n]	24-Nov-2008	Ischiopsopha wallacei	Larva		Larva	C. Moeseneder	24-Nov-2008	Australia	Queensland	Mowbray Valley, 8 km S of Port Douglas	-16.5771	145.483
AUCET222-13	MIC60645-001	MIC60645-001	BOLD:ACJ2855	MT323932	667[0n]	14-Jan-2004	Ischiopsopha wallacei	Adult	F	Adult	A.I.Knight	14-Jan-2004	Australia	Queensland	Dauan Island, Torres Strait	-9.422	142.534
AUCET226-13	MIC60646-001	MIC60646-001		MT323931	559[8n]	12-Feb-2004	Ischiopsopha wallacei	Adult	M	Adult	A.I.Knight	12-Feb-2004	Australia	Queensland	Saibai Island, Torres Strait	-9.4	142.667
AUCET312-13	MIC60855-001	MIC60855-001	BOLD:ADG8568	MT323936	559[4n]	19-Dec-2008	Lenosoma fulgens	Adult	F	Adult	Cory Dale	19-Dec-2008	Australia	Queensland	Maidenwell	-26.859	151.794
AUCET358-13	MIC60905-001	MIC60905-001	BOLD:ADG8568	MT323935	559[0n]	02-Jan-2010	Lenosoma fulgens	Adult	F	Adult		02-Jan-2010	Australia	Queensland	Lamington Plateau	-28.24	153.11
AUCET386-13	MIC60959-001	MIC60959-001	BOLD:ADG8568	MT323934	559[0n]	31-Dec-2010	Lenosoma fulgens	Adult	M	Adult	C.Moeseneder, C.Dale & B.Howton	31-Dec-2010	Australia	Queensland	Benarkin State Forest	-26.872	152.204
AUCET168-13	MIC60553-001	MIC60553-001	BOLD:ACJ2948	MT323938	517[0n]	06-Jan-2006	Lomaptera australis	Adult	M	Adult	A.I.Knight	06-Jan-2006	Australia	Queensland	Dauan Island, Torres Strait	-9.421	142.536
AUCET216-13	MIC60639-002	MIC60639-002	BOLD:ACJ2948	MT323937	559[2n]	06-Jan-2006	Lomaptera australis	Adult	M	Adult	A.I.Knight	06-Jan-2006	Australia	Queensland	Dauan Island, Torres Strait	-9.422	142.534
AUCET223-13	MIC60645-002	MIC60645-002		MT323939	471[5n]	14-Jan-2004	Lomaptera australis	Adult	F	Adult	A.I.Knight	14-Jan-2004	Australia	Queensland	Dauan Island, Torres Strait	-9.422	142.534
AUCET140-13	MIC60522-008	MIC60522-008	BOLD:ACJ2531	MT323941	667[0n]	17-Dec-2007	Lomaptera cinnamomea	Adult	M	Adult	C.& W.Moeseneder	17-Dec-2007	Australia	Queensland	Mowbray Valley 8 km S of Port Douglas	-16.577	145.483
AUCET334-13	MIC60874-001	MIC60874-001		MT323940	313[0n]	16-Jan-2010	Lomaptera cinnamomea	Adult	F	Adult	Cory Dale	16-Jan-2010	Australia	Queensland	2 km S of Brinsmead	-16.922	145.717
AUCET400-13	MIC60967-002	MIC60967-002			182[0n]	08-Jan-2011	Lyraphora bassii	Adult	M	Adult	C.& T.Moeseneder, C. Dale	08-Jan-2011	Australia	Queensland	Fire Tower No. 2, Dunmore State Forest	-27.627	151.02
AUCET120-13	MIC60495-002	MIC60495-002	BOLD:ACJ2634	MT323942	559[0n]	25-Nov-2007	Lyraphora obliquata	Adult	M	Adult	C.& S.Moeseneder	25-Nov-2007	Australia	Queensland	Point Talburpin, Redland Bay	-27.639	153.312
AUCET246-13	MIC60690-003	MIC60690-003	BOLD:ACJ2635	MT323945	667[0n]	07-Apr-2009	Lyraphora obliquata	Larva		Larva	C.& S.Moeseneder	07-Apr-2009	Australia	Queensland	Redland Bay	-27.643	153.312
AUCET304-13	MIC60828-030	MIC60828-030	BOLD:ACJ2634	MT323943	559[0n]	21-Sep-2009	Lyraphora obliquata	Adult	F	Adult	C.& T.Moeseneder	21-Sep-2009	Australia	Queensland	Point Talburpin, Redland Bay	-27.644	153.311
AUCET305-13	MIC60828-040	MIC60828-040	BOLD:ACJ2634	MT323944	559[0n]	21-Sep-2009	Lyraphora obliquata	Adult	M	Adult	C.& T.Moeseneder	21-Sep-2009	Australia	Queensland	Point Talburpin, Redland Bay	-27.644	153.311
AUCET098-13	MIC60505-001	MIC60505-001	BOLD:ACJ2908	MT323951	667[0n]	14-Dec-2007	Lyraphora velutina	Adult	M	Adult	C.& W.Moeseneder	14-Dec-2007	Australia	Queensland	Atherton	-17.26	145.482
AUCET099-13	MIC60505-002	MIC60505-002		MT323947	319[0n]	14-Dec-2007	Lyraphora velutina	Adult	M	Adult	C.& W.Moeseneder	14-Dec-2007	Australia	Queensland	Atherton	-17.26	145.482
AUCET100-13	MIC60505-006	MIC60505-006	BOLD:ACJ2908	MT323946	667[1n]	14-Dec-2007	Lyraphora velutina	Adult	F	Adult	C.& W.Moeseneder	14-Dec-2007	Australia	Queensland	Atherton	-17.26	145.482
AUCET143-13	MIC60527-002	MIC60527-002	BOLD:ACJ2908	MT323948	667[0n]	24-Nov-2008	Lyraphora velutina	Larva		Larva	C.& S.Moeseneder	24-Nov-2008	Australia		Eggs and larvae produced by 60506-001 (female) and 60507-001 (male)	-17.269	145.479
AUCET144-13	MIC60527-017	MIC60527-017	BOLD:ACJ2908	MT323949	667[0n]	24-Nov-2008	Lyraphora velutina	Larva		Larva	C.& S.Moeseneder	24-Nov-2008	Australia		Eggs and larvae produced by 60506-001 (female) and 60507-001 (male)	-17.269	145.479
AUCET145-13	MIC60527-018	MIC60527-018	BOLD:ACJ2908	MT323950	667[0n]	24-Nov-2008	Lyraphora velutina	Larva		Larva	C.& S.Moeseneder	24-Nov-2008	Australia		Eggs and larvae produced by 60506-001 (female) and 60507-001 (male)	-17.269	145.479
AUCET555-18	AFBRC8061-02	AFBRC8061-02	BOLD:ADM7988	MT323955	667[0n]	26-Dec-2017	Metallesthes anneliesae	Adult	F	Adult	C.& S.Moeseneder	26-Dec-2017	Australia	Queensland	9.930 km NNW of Miles	-26.574	150.149
AUCET566-18	AFBRC8074-04	AFBRC8074-04	BOLD:ADH0890	MT323952	667[0n]	12-Dec-2017	Metallesthes anneliesae	Adult	M	Adult	C.& S.Moeseneder	12-Dec-2017	Australia	Queensland	Junction Western Creek Dunmore Road	-27.698	151.032
AUCET390-13	MIC60965-001	K403290	BOLD:ADH0890	MT323954	559[0n]	04-Jan-2011	Metallesthes anneliesae	Adult	M	Adult	C. Dale & B. Howton	04-Jan-2011	Australia	Queensland	The Quarry, Dunmore State Forest	-27.6477	151.028
AUCET391-13	MIC60965-003	MIC60965-003		MT323953	313[0n]	04-Jan-2011	Metallesthes anneliesae	Adult	M	Adult	C. Dale & B. Howton	04-Jan-2011	Australia	Queensland	The Quarry, Dunmore State Forest	-27.6477	151.028
AUCET409-13	MIC60968-004	MIC60968-004	BOLD:ADH0890	MT323956	559[0n]	08-Jan-2011	Metallesthes anneliesae	Adult	M	Adult	C.& T.Moeseneder, C. Dale	08-Jan-2011	Australia	Queensland	The Quarry, Dunmore State Forest	-27.6477	151.028
AUCET410-13	MIC60968-006	MIC60968-006		MT323957	313[0n]	08-Jan-2011	Metallesthes anneliesae	Adult	M	Adult	C.& T.Moeseneder, C. Dale	08-Jan-2011	Australia	Queensland	The Quarry, Dunmore State Forest	-27.6477	151.028
AUCET411-13	MIC60968-007	MIC60968-007	BOLD:ADH0890	MT323958	559[0n]	08-Jan-2011	Metallesthes anneliesae	Adult	M	Adult	C.& T.Moeseneder, C. Dale	08-Jan-2011	Australia	Queensland	The Quarry, Dunmore State Forest	-27.6477	151.028
AUCET572-18	AFBRC8086-01	AFBRC8086-01	BOLD:ADM8215	MT323961	667[0n]	21-Jan-2018	Metallesthes metallescens	Adult	M	Adult	Paul Hutchinson	21-Jan-2018	Australia	Western Australia	25.000 km S of Great Northern Highway	-30.111	117.26
AUCET576-18	AFBRC8087-01	AFBRC8087-01	BOLD:ADM8215	MT323960	667[0n]	21-Jan-2018	Metallesthes metallescens	Adult	F	Adult	Paul Hutchinson	21-Jan-2018	Australia	Western Australia	76.000 km NE of Wubin	-29.629	117.139
AUCET577-18	AFBRC8087-02	AFBRC8087-02	BOLD:ADM8215	MT323959	667[0n]	21-Jan-2018	Metallesthes metallescens	Adult	M	Adult	Paul Hutchinson	21-Jan-2018	Australia	Western Australia	76.000 km NE of Wubin	-29.629	117.139
AUCET615-18	AFBRC8113-01	AFBRC8113-01	BOLD:ADM8395	MT323962	667[3n]	18-Jan-2018	Metallesthes sp_mhur_chm	Adult	M	Adult	M. Hura	18-Jan-2018	Australia	South Australia
AUCET616-18	AFBRC8113-02	AFBRC8113-02	BOLD:ADM8395	MT323963	627[2n]	18-Dec-2018	Metallesthes sp_mhur_chm	Adult	M	Adult	M. Hura	18-Dec-2018	Australia	South Australia
AUCET617-18	AFBRC8113-03	AFBRC8113-03	BOLD:ADM8395	MT323964	667[5n]	18-Jan-2018	Metallesthes sp_mhur_chm	Adult	M	Adult	M. Hura	18-Jan-2018	Australia	South Australia
AUCET606-18	AFBRC8102-01	AFBRC8102-01	BOLD:ACA2989	MT323967	667[0n]	26-Jan-2018	Metallesthes unicolor	Adult	F	Adult	Allen Sundholm (leg), Robert Richardson, Andreas Urban	26-Jan-2018	Australia	New South Wales	2.320 km ESE of Glenroi	-33.312	149.126
AUCET610-18	AFBRC8105-01	AFBRC8105-01	BOLD:ACA2989	MT323966	667[0n]	25-Jan-2018	Metallesthes unicolor	Adult	M	Adult	Allen Sundholm (leg), Robert Richardson, Andreas Urban	25-Jan-2018	Australia	New South Wales	15.980 km W of Eubalong West	-33.062	146.224
AUCET611-18	AFBRC8105-02	AFBRC8105-02	BOLD:ACA2989	MT323965	630[0n]	25-Jan-2018	Metallesthes unicolor	Adult	F	Adult	Allen Sundholm (leg), Robert Richardson, Andreas Urban	25-Jan-2018	Australia	New South Wales	15.980 km W of Eubalong West	-33.062	146.224
AUCET605-18	AFBRC8101-01	AFBRC8101-01	BOLD:ADM7349	MT323968	667[0n]		Micropoecila cincta	Adult	F	Adult	Allen Sunderholm		Australia	New South Wales	2.600 km NNW of Howes Valley	-32.856	150.788
AUCET206-13	MIC60632-001	MIC60632-001	BOLD:ACJ2570	MT323969	559[0n]	28-Dec-2002	Micropoecila cincta	Adult	M	Adult	Paul Hutchinson	28-Dec-2002	Australia	Western Australia	Pipidinny km N of Perth	-31.583	115.683
AUCET548-18	AFBRC8040-05	AFBRC8040-05	BOLD:ADM7259	MT323970	625[0n]	02-Dec-2017	Microvalgus glaber	Adult	M	Adult	C.& S.Moeseneder	02-Dec-2017	Australia	New South Wales	10.180 km S of Milbrodale	-32.755	150.924
AUCET549-18	AFBRC8040-06	AFBRC8040-06	BOLD:ADM7259	MT323971	628[1n]	02-Dec-2017	Microvalgus glaber	Adult	M	Adult	C.& S.Moeseneder	02-Dec-2017	Australia	New South Wales	10.180 km S of Milbrodale	-32.755	150.924
AUCET544-18	AFBRC8040-01	AFBRC8040-01	BOLD:ADM7007	MT323973	667[4n]	02-Dec-2017	Microvalgus nigrinus	Adult	M	Adult	C.& S.Moeseneder	02-Dec-2017	Australia	New South Wales	10.180 km S of Milbrodale	-32.755	150.924
AUCET545-18	AFBRC8040-02	AFBRC8040-02	BOLD:ADM7007	MT323975	667[0n]	02-Dec-2017	Microvalgus nigrinus	Adult	M	Adult	C.& S.Moeseneder	02-Dec-2017	Australia	New South Wales	10.180 km S of Milbrodale	-32.755	150.924
AUCET546-18	AFBRC8040-03	AFBRC8040-03	BOLD:ADM7007	MT323972	667[0n]	02-Dec-2017	Microvalgus nigrinus	Adult	F	Adult	C.& S.Moeseneder	02-Dec-2017	Australia	New South Wales	10.180 km S of Milbrodale	-32.755	150.924
AUCET547-18	AFBRC8040-04	AFBRC8040-04	BOLD:ADM7007	MT323974	667[1n]	02-Dec-2017	Microvalgus nigrinus	Adult	F	Adult	C.& S.Moeseneder	02-Dec-2017	Australia	New South Wales	10.180 km S of Milbrodale	-32.755	150.924
AUCET451-13	MIC61026-001	MIC61026-001	BOLD:ADH2704	MT323977	559[0n]	07-Jan-2012	Microvalgus sp_mvalg4_chm	Adult	M	Adult	C.& S.Moeseneder, C. Dale	07-Jan-2012	Australia	Queensland
AUCET452-13	MIC61026-006	MIC61026-006	BOLD:ADH2704	MT323976	559[0n]	07-Jan-2012	Microvalgus sp_mvalg4_chm	Adult	M	Adult	C.& S.Moeseneder, C. Dale	07-Jan-2012	Australia	Queensland
AUCET560-18	AFBRC8071-25	AFBRC8071-25	BOLD:ADH3009	MT323982	667[0n]	05-Jan-2018	Microvalgus vagans	Adult	M	Adult	C.Moeseneder	05-Jan-2018	Australia	Queensland	1.250 km N of Windaroo	-27.73	153.19
AUCET561-18	AFBRC8071-26	AFBRC8071-26	BOLD:ADH3009	MT323981	667[0n]	05-Jan-2018	Microvalgus vagans	Adult	M	Adult	C.Moeseneder	05-Jan-2018	Australia	Queensland	1.250 km N of Windaroo	-27.73	153.19
AUCET562-18	AFBRC8071-27	AFBRC8071-27	BOLD:ADH3009	MT323978	667[0n]	05-Jan-2018	Microvalgus vagans	Adult	F	Adult	C.Moeseneder	05-Jan-2018	Australia	Queensland	1.250 km N of Windaroo	-27.73	153.19
AUCET563-18	AFBRC8071-28	AFBRC8071-28	BOLD:ADH3009	MT323979	667[0n]	05-Jan-2018	Microvalgus vagans	Adult	F	Adult	C.Moeseneder	05-Jan-2018	Australia	Queensland	1.250 km N of Windaroo	-27.73	153.19
AUCET453-13	MIC61026-010	MIC61026-010	BOLD:ADH3009	MT323980	646[0n]	07-Jan-2012	Microvalgus vagans	Adult	M	Adult	C.& S.Moeseneder and Cory Dale	07-Jan-2012	Australia	Queensland	Dunmore State Forest	-27.695	150.99
AUCET127-13	MIC60501-002	MIC60501-002		MT323983	271[0n]	12-Dec-2007	Mycterophallus duboulayi	Adult	F	Adult	C.& W.Moeseneder	12-Dec-2007	Australia	Queensland	Atherton	-17.27	145.487
AUCET129-13	MIC60501-006	MIC60501-006	BOLD:ACJ2561	MT323987	667[0n]	12-Dec-2007	Mycterophallus duboulayi	Adult	M	Adult	C.& W.Moeseneder	12-Dec-2007	Australia	Queensland	Atherton	-17.27	145.487
AUCET102-13	MIC60508-001	MIC60508-001	BOLD:ACJ2561	MT323984	667[0n]	13-Dec-2007	Mycterophallus duboulayi	Adult	F	Adult	C.& W.Moeseneder	13-Dec-2007	Australia	Queensland	Atherton	-17.263	145.507
AUCET146-13	MIC60528-002	MIC60528-002	BOLD:ACJ2561	MT323985	667[0n]	06-May-2008	Mycterophallus duboulayi	Larva		Larva	C.& W. Moeseneder	06-May-2008	Australia	Queensland	Atherton	-17.2626	145.507
AUCET250-13	MIC60705-001	MIC60705-001	BOLD:ACJ2561	MT323986	667[0n]	18-Dec-2008	Mycterophallus duboulayi	Adult	F	Adult	Jack Hasenpusch	18-Dec-2008	Australia	Queensland	Garradunga	-17.459	146.021
AUCET027-13	MIC61103-004	MIC61103-004	BOLD:ADH1483	MT323991	559[0n]	16-Jan-2013	Navigator fossor	Adult	M	Adult	P. Hutchinson	16-Jan-2013	Australia	Western Australia	10 km W of Menzies	-29.7	120.925
AUCET029-13	MIC61103-006	MIC61103-006		MT323990	313[0n]	16-Jan-2013	Navigator fossor	Adult	M	Adult	P. Hutchinson	16-Jan-2013	Australia	Western Australia	10 km W of Menzies	-29.7	120.925
AUCET030-13	MIC61103-007	MIC61103-007	BOLD:ADH1483	MT323989	559[0n]	16-Jan-2013	Navigator fossor	Larva		Larva	P. Hutchinson	16-Jan-2013	Australia	Western Australia	10 km W of Menzies	-29.7	120.925
AUCET032-13	MIC61103-009	MIC61103-009	BOLD:ADH1483	MT323988	545[1n]	16-Jan-2013	Navigator fossor	Larva		Larva	P. Hutchinson	16-Jan-2013	Australia	Western Australia	10 km W of Menzies	-29.7	120.925
AUCET009-13	MIC61086-003	MIC61086-003	BOLD:ADG8191	MT323992	646[0n]	03-Dec-2012	Navigator pixii	Adult	M	Adult	C.& S.Moeseneder	03-Dec-2012	Australia	Queensland	Boggomoss (QM site BM03), Trap 2012/11	-25.4282	150.025
AUCET568-18	AFBRC8075-01	AFBRC8075-01	BOLD:ADH1970	MT323993	624[0n]	11-Dec-2017	Neoclithria eburneoguttata	Adult	M	Adult	C.& S.Moeseneder	11-Dec-2017	Australia	Queensland	3.230 km NE of Boonah	-27.98	152.708
AUCET002-13	MIC61084-001	MIC61084-001	BOLD:ADH1970	MT323994	646[0n]	17-Dec-2012	Neoclithria eburneoguttata	Adult	M	Adult	C.Dale	17-Dec-2012	Australia	Queensland	Cunningham Highway 2 km W of Thane	-28.163	151.675
AUCET113-13	MIC60443-010	MIC60443-010	BOLD:ACJ2535	MT323998	559[3n]	10-Jan-2007	Neorrhina octopunctatum	Adult	M	Adult	C.& S.Moeseneder	10-Jan-2007	Australia	Queensland	Rosins Lookout, Beechmont	-28.117	153.203
AUCET115-13	MIC60449-001	MIC60449-001	BOLD:ACJ2535	MT323995	559[0n]	21-Jan-2007	Neorrhina octopunctatum	Adult	F	Adult	C.& S.Moeseneder	21-Jan-2007	Australia	Queensland	Rosins Lookout, Beechmont	-28.118	153.203
AUCET249-13	MIC60703-003	MIC60703-003	BOLD:ACJ2535	MT323997	667[0n]	23-Dec-2008	Neorrhina octopunctatum	Adult	M	Adult	C.Moeseneder & R.Zietek	23-Dec-2008	Australia	Queensland	Rosins Lookout, Beechmont	-28.118	153.203
AUCET253-13	MIC60714-007	MIC60714-007	BOLD:ACJ2535	MT323996	667[0n]	06-Jan-2009	Neorrhina octopunctatum	Adult	M	Adult	C. Moeseneder & R. Zietek	06-Jan-2009	Australia	Queensland	Rosins Lookout, Beechmont	-28.118	153.203
AUCET086-13	MIC60037-013	MIC60037-013	BOLD:ACJ2925	MT324005	559[0n]	09-Nov-2000	Neorrhina punctatum	Adult	F	Adult	C.& S.Moeseneder	09-Nov-2000	Australia	Queensland	1 km S of Cleveland	-27.554	153.265
AUCET093-13	MIC60422-005	MIC60422-005	BOLD:ACJ2925	MT323999	667[0n]	22-Dec-2006	Neorrhina punctatum	Adult	F	Adult	C.& S.Moeseneder	22-Dec-2006	Australia	Queensland	Redland Bay	-27.618	153.292
AUCET124-13	MIC60497-003	MIC60497-003	BOLD:AAH3790	MT324003	517[0n]	01-Dec-2007	Neorrhina punctatum	Adult	M	Adult	C.& S.Moeseneder	01-Dec-2007	Australia	Queensland	Rosins Lookout, Beechmont	-28.118	153.203
AUCET130-13	MIC60501-008	MIC60501-008	BOLD:ACJ2925	MT324002	667[0n]	12-Dec-2007	Neorrhina punctatum	Adult	M	Adult	C.& W.Moeseneder	12-Dec-2007	Australia	Queensland	Atherton	-17.27	145.487
AUCET107-13	MIC60518-003	MIC60518-003	BOLD:ACJ2925	MT324004	667[0n]	15-Dec-2007	Neorrhina punctatum	Adult	F	Adult	C.& W.Moeseneder	15-Dec-2007	Australia	Queensland	Kuranda	-16.82	145.634
AUCET220-13	MIC60643-001	MIC60643-001		MT324001	287[10n]	02-Jan-2002	Neorrhina punctatum	Adult	M	Adult	Justin Bartlett	02-Jan-2002	Australia	Queensland	Great Keppel Island, along airfield	-23.176	150.956
AUCET221-13	MIC60644-001	MIC60644-001		MT324000	559[12n]	31-Dec-2003	Neorrhina punctatum	Adult	M	Adult	Justin Bartlett	31-Dec-2003	Australia	New South Wales	Port Macquarie, Ocean Drive between Port Macquarie and Lake Cathie	-31.515	152.89
AUCET065-13	MIC10002-003	MIC10002-003	BOLD:ADH0305	MT324006	559[0n]	06-Jan-2010	Octocollis setosus	Adult	M	Adult	D.Knowles & M.Powell	06-Jan-2010	Australia	Queensland	17 km W of Paluma	-19.011	146.048
AUCET559-18	AFBRC8062-01	AFBRC8062-01	BOLD:ADM8140	MT324007	667[0n]	03-Jan-2018	Phyllopodium palmatum	Adult	F	Adult	C.Moeseneder	03-Jan-2018	Australia	Queensland	3.400 km E of Miles	-26.66	150.219
AUCET299-13	MIC60823-001	MIC60823-001	BOLD:ACJ2947	MT324009	667[0n]	01-Feb-2009	Poecilopharis leai	Larva		Larva	Paul Hasenpusch	01-Feb-2009	Australia	Queensland	Polly Creek, Garradunga	-17.461	145.996
AUCET300-13	MIC60823-002	MIC60823-002	BOLD:ACJ2947	MT324010	667[0n]	01-Feb-2009	Poecilopharis leai	Larva		Larva	Paul Hasenpusch	01-Feb-2009	Australia	Queensland	Polly Creek, Garradunga	-17.461	145.996
AUCET303-13	MIC60823-014	MIC60823-014	BOLD:ACJ2947	MT324008	559[0n]	01-Feb-2009	Poecilopharis leai	Adult		Adult	Paul Hasenpusch	01-Feb-2009	Australia	Queensland	Polly Creek, Garradunga	-17.461	145.996
AUCET092-13	MIC60404-030	MIC60404-030	BOLD:AAI7325	MT324016	559[0n]	11-Nov-2006	Protaetia fusca	Adult	F	Adult	C.& S.Moeseneder	11-Nov-2006	Australia	Queensland	Redland Bay	-27.625	153.29
AUCET094-13	MIC60422-008	MIC60422-008	BOLD:AAI7325	MT324011	559[0n]	22-Dec-2006	Protaetia fusca	Adult	M	Adult	C.& S.Moeseneder	22-Dec-2006	Australia	Queensland	Redland Bay	-27.618	153.292
AUCET118-13	MIC60482-001	MIC60482-001	BOLD:AAI7325	MT324013	559[0n]	14-Oct-2007	Protaetia fusca	Adult	M	Adult	T. Moeseneder	14-Oct-2007	Australia	Queensland	Point Talburpin, Redland Bay	-27.644	153.311
AUCET103-13	MIC60509-001	MIC60509-001	BOLD:AAI7325	MT324012	559[0n]	11-Dec-2007	Protaetia fusca	Adult	F	Adult	C.& W.Moeseneder	11-Dec-2007	Australia	Queensland	6 km S of Port Douglas	-16.532	145.465
AUCET104-13	MIC60509-002	MIC60509-002	BOLD:AAI7325	MT324015	559[0n]	11-Dec-2007	Protaetia fusca	Adult	M	Adult	C.& W.Moeseneder	11-Dec-2007	Australia	Queensland	6 km S of Port Douglas	-16.532	145.465
AUCET219-13	MIC60642-001	MIC60642-001	BOLD:AAI7325	MT324014	559[0n]	04-Feb-2004	Protaetia fusca	Adult	M	Adult	A.I.Knight	04-Feb-2004	Australia	Queensland	Saibai Island, Torres Strait	-9.4	142.667
AUCET588-18	AFBRC8091-01	AFBRC8091-01	BOLD:ADM8181	MT324018	667[0n]	21-Jan-2018	Pseudoclithria adusta	Adult	M	Adult	Paul Hutchinson	21-Jan-2018	Australia	Western Australia	10.500 km S of Eneabba	-29.909	115.253
AUCET590-18	AFBRC8093-01	AFBRC8093-01	BOLD:ADM8181	MT324019	667[0n]	12-Jan-2018	Pseudoclithria adusta	Adult	M	Adult	Paul Hutchinson	12-Jan-2018	Australia	Western Australia	10.000 km S of Eneabba	-29.909	115.266
AUCET591-18	AFBRC8093-02	AFBRC8093-02	BOLD:ADM8181	MT324017	646[0n]	12-Jan-2018	Pseudoclithria adusta	Adult	M	Adult	Paul Hutchinson	12-Jan-2018	Australia	Western Australia	10.000 km S of Eneabba	-29.909	115.266
AUCET618-18	AFBRC8114-01	AFBRC8114-01	BOLD:ADM7262	MT324021	646[0n]	11-Dec-2017	Pseudoclithria anchoralis	Adult	M	Adult	Mark Hura	11-Dec-2017	Australia	South Australia	63.000 km NNW of Marla	-26.802	133.337
AUCET619-18	AFBRC8114-02	AFBRC8114-02	BOLD:ADM7262	MT324020	667[0n]	11-Dec-2017	Pseudoclithria anchoralis	Adult	M	Adult	Mark Hura	11-Dec-2017	Australia	South Australia	63.000 km NNW of Marla	-26.802	133.337
AUCET592-18	AFBRC8094-01	AFBRC8094-01	BOLD:ADM8742	MT324023	646[0n]	13-Jan-2018	Pseudoclithria dejecta	Adult	M	Adult	P. Hutchinson	13-Jan-2018	Australia	Western Australia	Floreat Beach, Perth	-31.929	115.755
AUCET593-18	AFBRC8094-02	AFBRC8094-02	BOLD:ADM8742	MT324022	667[0n]	13-Jan-2018	Pseudoclithria dejecta	Adult	M	Adult	P. Hutchinson	13-Jan-2018	Australia	Western Australia	Floreat Beach, Perth	-31.929	115.755
AUCET081-13	MIC10016-001	T159361	BOLD:ADH1169	MT324024	559[0n]	10-Oct-1998	Pseudoclithria hirticeps	Adult	F	Adult	Monteith & Gough	10-Oct-1998	Australia	Queensland	Wetheron, 3.5 km SW, 7509	-25.545	151.714
AUCET463-13	MIC61036-001	MIC61036-001	BOLD:ADG9826	MT324026	559[1n]	12-Feb-2012	Pseudoclithria sp_phop_chm	Adult	M	Adult	P. Hutchinson	12-Feb-2012	Australia	Western Australia
AUCET033-13	MIC61104-001	MIC61104-001	BOLD:ADG9826	MT324027	559[1n]	19-Jan-2013	Pseudoclithria sp_phop_chm	Larva		Larva	P. Hutchinson	19-Jan-2013	Australia	Western Australia
AUCET034-13	MIC61104-002	MIC61104-002	BOLD:ADG9826	MT324025	646[0n]	19-Jan-2013	Pseudoclithria sp_phop_chm	Larva		Larva	P. Hutchinson	19-Jan-2013	Australia	Western Australia
AUCET594-18	AFBRC8095-01	AFBRC8095-01	BOLD:ADM8394	MT324028	667[0n]	13-Jan-2018	Pseudoclithria sp_pwan_chm	Adult	M	Adult	P. Hutchinson	13-Jan-2018	Australia	Western Australia
AUCET595-18	AFBRC8095-02	AFBRC8095-02	BOLD:ADM8394	MT324029	667[0n]	13-Jan-2018	Pseudoclithria sp_pwan_chm	Adult	M	Adult	P. Hutchinson	13-Jan-2018	Australia	Western Australia
AUCET596-18	AFBRC8095-04	AFBRC8095-04	BOLD:ADM8394	MT324030	667[0n]	13-Jan-2018	Pseudoclithria sp_pwan_chm	Adult	M	Adult	P. Hutchinson	13-Jan-2018	Australia	Western Australia
AUCET108-13	MIC60440-022	MIC60440-022	BOLD:ACJ2508	MT324034	667[0n]	06-Jan-2007	Schizorhina atropunctata	Adult	M	Adult	C.& S.Moeseneder	06-Jan-2007	Australia	Queensland	Rosins Lookout, Beechmont	-28.118	153.203
AUCET141-13	MIC60523-001	MIC60523-001	BOLD:ACJ2508	MT324033	667[0n]	20-Dec-2007	Schizorhina atropunctata	Adult	F	Adult	C. & A.Moeseneder	20-Dec-2007	Australia	Queensland	Rosins Lookout, Beechmont	-28.118	153.203
AUCET252-13	MIC60714-001	MIC60714-001	BOLD:ACJ2508	MT324032	667[0n]	06-Jan-2009	Schizorhina atropunctata	Adult	M	Adult	C. Moeseneder & R. Zietek	06-Jan-2009	Australia	Queensland	Rosins Lookout, Beechmont	-28.118	153.203
AUCET225-13	MIC60723-001	MIC60723-001	BOLD:ACJ2508	MT324031	657[0n]	28-Mar-2009	Schizorhina atropunctata	Larva		Larva		28-Mar-2009	Australia		One larva from eggs laid by 60714-003	-28.118	153.203
AUCET202-13	MIC60629-001	MIC60629-001	BOLD:ACJ2598	MT324036	517[1n]	10-Feb-1991	Schizorhina immaculata	Adult	M	Adult	Jack Hasenpusch	10-Feb-1991	Australia	Queensland	Kuranda	-16.821	145.634
AUCET297-13	MIC60788-001	MIC60788-001	BOLD:ACJ2598	MT324035	559[0n]	20-Nov-1991	Schizorhina immaculata	Adult	M	Adult		20-Nov-1991	Australia	Queensland	Mt. Lewis	-16.583	145.283
AUCET369-13	MIC60914-002	MIC60914-002	BOLD:ADH2864	MT324037	559[0n]	08-Feb-2010	Stenopisthes frenchi	Adult	M	Adult	J.Hasenpusch	08-Feb-2010	Australia	Queensland	Polly Creek, Garradunga	-17.46	145.96
AUCET295-13	MIC60772-005	MIC60772-005	BOLD:ADH2558	MT324038	559[0n]	04-Jan-1995	Storeyus fasciculatum	Adult	F	Adult		04-Jan-1995	Australia	New South Wales	Acacia Plateau	-28.382	152.368
AUCET003-13	MIC61085-001	MIC61085-001	BOLD:ADG8829	MT324040	646[0n]	29-Dec-2012	Tapinoschema digglesii	Adult	M	Adult	C.Moeseneder & R. Zietek	29-Dec-2012	Australia	Queensland	Taroom, Caltex petrol station and 5 Short Street	-25.643	149.794
AUCET004-13	MIC61085-002	MIC61085-002	BOLD:ADG8829	MT324041	646[0n]	29-Dec-2012	Tapinoschema digglesii	Adult	M	Adult	C.Moeseneder & R. Zietek	29-Dec-2012	Australia	Queensland	Taroom, Caltex petrol station and 5 Short Street	-25.643	149.794
AUCET005-13	MIC61085-003	MIC61085-003	BOLD:ADG8829	MT324042	646[0n]	29-Dec-2012	Tapinoschema digglesii	Adult	M	Adult	C.Moeseneder & R. Zietek	29-Dec-2012	Australia	Queensland	Taroom, Caltex petrol station and 5 Short Street	-25.643	149.794
AUCET006-13	MIC61085-004	MIC61085-004	BOLD:ADG8829	MT324039	646[0n]	29-Dec-2012	Tapinoschema digglesii	Adult	M	Adult	C.Moeseneder & R. Zietek	29-Dec-2012	Australia	Queensland	Taroom, Caltex petrol station and 5 Short Street	-25.643	149.794
AUCET039-13	MIC61123-006	MIC61123-006	BOLD:ADG8829	MT324043	646[0n]	22-Jun-2013	Tapinoschema digglesii	Larva		Larva	C.& S.Moeseneder	22-Jun-2013	Australia	Queensland	Taroom	-25.639	149.79
AUCET491-13	MIC61050-001	MIC61050-001	BOLD:ADG9762	MT324044	559[0n]	14-Dec-2006	Tapinoschema impar	Adult	M	Adult	G. Monteith, S. Wright & D. Cook	14-Dec-2006	Australia	Queensland	`Toomba` site 1	-19.968	145.58
AUCET578-18	AFBRC8088-01	AFBRC8088-01	BOLD:ADH3290	MT324050	667[0n]	13-Dec-2017	Tapinoschema lacunosa	Adult	M	Adult	Paul Hutchinson	13-Dec-2017	Australia	Western Australia	20.000 km E of Norseman	-32.1	121.953
AUCET579-18	AFBRC8088-02	AFBRC8088-02	BOLD:ADH3290	MT324049	667[0n]	13-Dec-2017	Tapinoschema lacunosa	Adult	F	Adult	Paul Hutchinson	13-Dec-2017	Australia	Western Australia	20.000 km E of Norseman	-32.1	121.953
AUCET580-18	AFBRC8088-03	AFBRC8088-03	BOLD:ADH3290	MT324048	667[0n]	13-Dec-2017	Tapinoschema lacunosa	Adult	M	Adult	Paul Hutchinson	13-Dec-2017	Australia	Western Australia	20.000 km E of Norseman	-32.1	121.953
AUCET035-13	MIC61101-004	MIC61101-004	BOLD:ADH3290	MT324045	559[0n]	18-Jan-2013	Tapinoschema lacunosa	Larva		Larva	P. Hutchinson	18-Jan-2013	Australia	Queensland	20 km E of Norseman	-32.095	121.965
AUCET036-13	MIC61101-007	MIC61101-007	BOLD:ADH3290	MT324046	667[0n]	18-Jan-2013	Tapinoschema lacunosa	Larva		Larva	P. Hutchinson	18-Jan-2013	Australia	Western Australia	20 km E of Norseman	-32.095	121.965
AUCET037-13	MIC61101-008	MIC61101-008	BOLD:ADH3290	MT324047	667[0n]	18-Jan-2013	Tapinoschema lacunosa	Larva		Larva	P. Hutchinson	18-Jan-2013	Australia	Western Australia	20 km E of Norseman	-32.095	121.965
AUCET600-18	AFBRC8097-03	AFBRC8097-03	BOLD:ADM8584	MT324051	667[0n]	01-Jan-2018	Trichaulax kirbyi	Adult	M	Adult	Geoff Walker	01-Jan-2018	Australia	Victoria	Upper Yarra Dam, Reefton	-37.674	145.876
AUCET621-18	AFBRC8117-01	AFBRC8117-01	BOLD:ACJ2924	MT324052	667[0n]	10-Feb-2016	Trichaulax marginipennis	Adult	M	Adult	Jack Hasenpusch	10-Feb-2016	Australia	Queensland	38.000 km W of Mt. Garnet	-17.677	144.75
AUCET628-18	AFBRC8123-01	AFBRC8123-01	BOLD:ACJ2924	MT324056	667[0n]	10-Feb-2018	Trichaulax marginipennis	Adult	M	Adult	Jack Hasenpusch	10-Feb-2018	Australia	Queensland	38.000 km W of Mt. Garnet	-17.677	144.75
AUCET156-13	MIC60542-003	MIC60542-003	BOLD:ACJ2924	MT324055	419[0n]	01-Mar-2008	Trichaulax marginipennis	Adult	F	Adult		01-Mar-2008	Australia
AUCET210-13	MIC60635-001	MIC60635-001		MT324057	313[0n]		Trichaulax marginipennis	Adult	F	Adult	R. Zieteck		Australia	Queensland	Greater Brisbane area	-27.55	153.19
AUCET211-13	MIC60635-002	MIC60635-002	BOLD:ACJ2924	MT324054	559[0n]		Trichaulax marginipennis	Adult	M	Adult	R. Zietek		Australia	Queensland		-27.55	153.19
AUCET363-13	MIC60910-001	MIC60910-001	BOLD:ACJ2924	MT324053	559[0n]	26-Jan-2010	Trichaulax marginipennis	Adult	M	Adult	J.Hasenpusch	26-Jan-2010	Australia	Queensland	60.00 km W of 40 Mile Scrub	-18.1364	144.337
AUCET620-18	AFBRC8116-01	AFBRC8116-01	BOLD:ADG9218	MT324059	667[0n]	13-Feb-2016	Trichaulax philipsii	Adult	M	Adult	Jack Hasenpusch	13-Feb-2016	Australia	Queensland	38.000 km W of Mt. Garnet	-17.677	144.75
AUCET015-13	MIC61098-001	MIC61098-001	BOLD:ADG9218	MT324060	559[0n]	05-Feb-2013	Trichaulax philipsii	Adult	M	Adult	C.& S.Moeseneder	05-Feb-2013	Australia	Queensland	2.9 km WSW of Beenleigh	-27.727	153.176
AUCET016-13	MIC61098-002	MIC61098-002	BOLD:ADG9218	MT324058	559[1n]	05-Feb-2013	Trichaulax philipsii	Adult	M	Adult	C.& S.Moeseneder	05-Feb-2013	Australia	Queensland	2.9 km WSW of Beenleigh	-27.727	153.176
AUCET565-18	AFBRC8074-03	AFBRC8074-03	BOLD:ADM7683	MT324061	667[0n]	12-Dec-2017	Trichaulax sp_tdun_chm	Adult	F	Adult	C. & S. Moeseneder	12-Dec-2017	Australia	Queensland
